# Supplementary material
Source: publisher site journal article supplement (https://www.dovepress.com/article/318304)
Supplement: Supplementary file 1 [file get_supplementary_file.php]

**Supplementary Material 1** Medium information for GMSCs.

| Complete medium | DMEM/F12, 10% FBS, 5 ng/mL bFGF, 2 mM L-glutamine |
| --- | --- |
| Adipocytes inducing medium | DMEM/F12, 10% FBS, 1 mM dexamethasone, 0.5 mM IBMX, 10 mg/mL insulin and 60 mM indomethacin |
| Osteogenic inducing medium | DMEM/F 12, 10% FBS, 0.5 mM dexamethasone, 10 mM β-glycerophosphate and 50 mg/mL vitamin C |
| Chondrogenic inducing medium | DMEM/F 12, 10% FBS, 1% ITS, 50 mg/mL L-proline, 0.1 mM dexamethasone, 0.9 mM sodium pyruvate, 50 mg/mL vitamin C and 10 ng/mL TGF-β3 |
| Neurogenic inducing medium | DMEM/F 12, 2% B27, 1% glutamine, 40 ng/ml medium-1 bFGF, 20 ng/ml EGF, 1 μM all-trans-retionic acid, and 100 μm 2-mercapoethanol |

**Supplementary Material 2** PCR primer sequence information of mouse.

| Gene name | Primer sequence |
| --- | --- |
| CXCL-1 | CTGGGATTCACCTCAAGAACATC |
|  | CAGGGTCAAGGCAAGCCTC |
| IL-8 | ATGCCCTCTATTCTGCCAGAT |
|  | GTGCTCCGGTTGTATAAGATGAC |
| TNF-α | ATGTCTCAGCCTCTTCTCATTC |
|  | GCTTGTCACTCGAATTTTGAGA |
| IFN-γ | ATGAACGCTACACACTGCATC |
|  | CCATCCTTTTGCCAGTTCCTC |
| TLR4 | ATGGCATGGCTTACACCACC |
|  | GAGGCCAATTTTGTCTCCACA |
| Myd88 | TCATGTTCTCCATACCCTTGGT |
|  | AAACTGCGAGTGGGGTCAG |
| IL-1RN | GCTCATTGCTGGGTACTTACAA |
|  | CCAGACTTGGCACAAGACAGG |
| IL-10 | GCTCTTACTGACTGGCATGAG |
|  | CGCAGCTCTAGGAGCATGTG |
| GAPDH | AGGTCGGTGTGAACGGATTTG |
|  | TGTAGACCATGTAGTTGAGGTCA |

**Abbreviation:** PCR, polymerase chain reaction

**Supplementary Material 3** Neutrophil content, lung injury score, kidney injury score, liver injury score, and myocardial injury score were measured.

**Neutrophil content:** Byusing a 100-point grid of a known area (62,500 μm2 at 400X magnification) that was attached to the ocular of the microscope, we counted the number of points that were hitting the alveolar tissue and the numbers of neutrophils and positive cells in each field. The cell density was determined as the number of positive cells in each field divided by the tissue area, and this value was expressed as cells/mm2 [1]. Morphometric measurements were performed in 15 fields for each animal at 400X magnification by an investigator who was blinded to the specific group that was studied.

**Kidney injury score:** Acute tubular damage was assessed via hematoxylin and eosin (HE) staining by using previously described criteria [2]. Acute tubular damage was scored by using a semiquantitative scoring system (0 to 3 points) for each criterion in 20 randomly sampled high-power fields of the cortex per animal (0 = absent, 1 = mild, 2 = moderate, and 3 = strong acute tubular damage).

**Liver injury score:** Formalin-fixed liver tissues were embedded in paraffin wax, serially sectioned, and then stained with HE. Morphological characteristics (including PMN infiltration, interstitial edema, focal necrosis, and hemorrhage/congestion) were evaluated under a light microscope, and Suzuki scores (i.e., the sum of the scores of congestion [0: none; 4: severe], vacuolization [0: none, 4: severe], and necrosis [0: none; 4: > 60%]) were calculated to determine the liver injury level [3, 4].

**Lung injury score:** The lung tissues were exposed to paraffin procedures and sectioned at approximately 5 μm thick, after which they were stained with HE, as has been previously described. Lung injury was evaluated and scored by two pathologists who were blinded to the experimental design by using a recent criterion [5, 6], in which lung damage was evaluated on a two-point scale with scores ranging from 0 to 1.

**Myocardial injury score:** Cardiac sections were prepared as previously described and stained with HE according to standard procedures. A pathologist was assigned to grade the MI injuries in a blinded fashion. Histological analyses of infarct size, hemorrhage, and leukocyte infiltration were scored as being none, weak, moderate, strong, or very strong (scores of 0, 1, 2, 3, or 4, respectively). This method for the objective quantification of MI injury has been previously described [7-9].


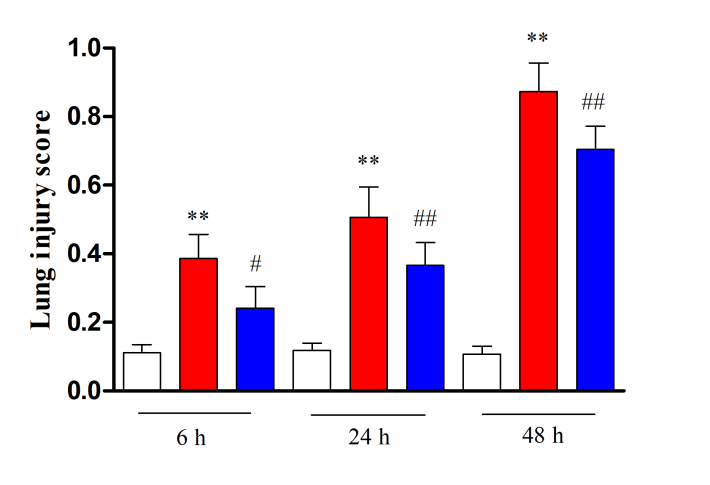


**Detection of lung injury score.**

**Notes:** LPS injection increased liver injury score, acute tubular damage score, and myocardial injury score, which was improved by GMSCs administration. White bars = Sham group, Red bars = LPS group, Blue bars = LPS +MSC group. *, *P* < 0.05 versus Sham group; # *P* < 0.05 versus LPS group; ** *P* < 0.01 versus Sham group; ## *P* < 0.01 versus LPS group. Values are expressed as the means ± SD.

**Detection of organ injury score**

| **Group** | **Con** | **LPS** | **LPS + MSC** |
| --- | --- | --- | --- |
| Liver injury score | 1.61 ± 2.33 | 4.96 ± 2.69** | 3.47 ± 0.47# |
| Acute tubular damage score | 1.43 ±0.17 | 5.73 ± 0.66** | 3.42 ± 0.41# |
| Myocardial injury score | 1.15 ± 0.18 | 4.49 ± 0.59** | 3.52 ± 0.57# |

LPS injection increased liver injury score, acute tubular damage score, and myocardial injury score, which was improved by GMSCs administration. * *P*<0.05 compared with the Sham group. # *P*<0.05 compared with the LPS group. ** *P*<0.01 compared with the Sham group. ## *P*<0.01 compared with the LPS group. Values are expressed as the means ± SD.

**Supplementary Material 4** Detection of CM-Dil-labeled GMSCs.

To identify the homing of GMSCs, GMSCs were treated with CM-Dil (C7000, Life technologies, Eugene, Oregon, USA) for 30 min in a incubator in the dark before GMSCs injection. Twenty-four mice were randomly assigned to one of three groups: (1) mice in the saline group (Sham) were intratracheally injected with an equal volume of normal saline to the volume of LPS; (2) mice in the LPS group (LPS) were intratracheally injected with 5 mg/kg LPS; and (3) mice in the LPS + MSC group (LPS + MSC) were intratracheally injected with 5 mg/kg LPS. GMSCs were treated with CM-Dil for 30 min. After an hour and a half hours later, the mice received 1×106 CM-Dil-labeled GMSCs via tail vein injection. Two weeks later, mice were sacrificed. The frozen lung tissue sections were examined to observe the CM-Dil-labeled GMSCs by a fluorescent microscope.


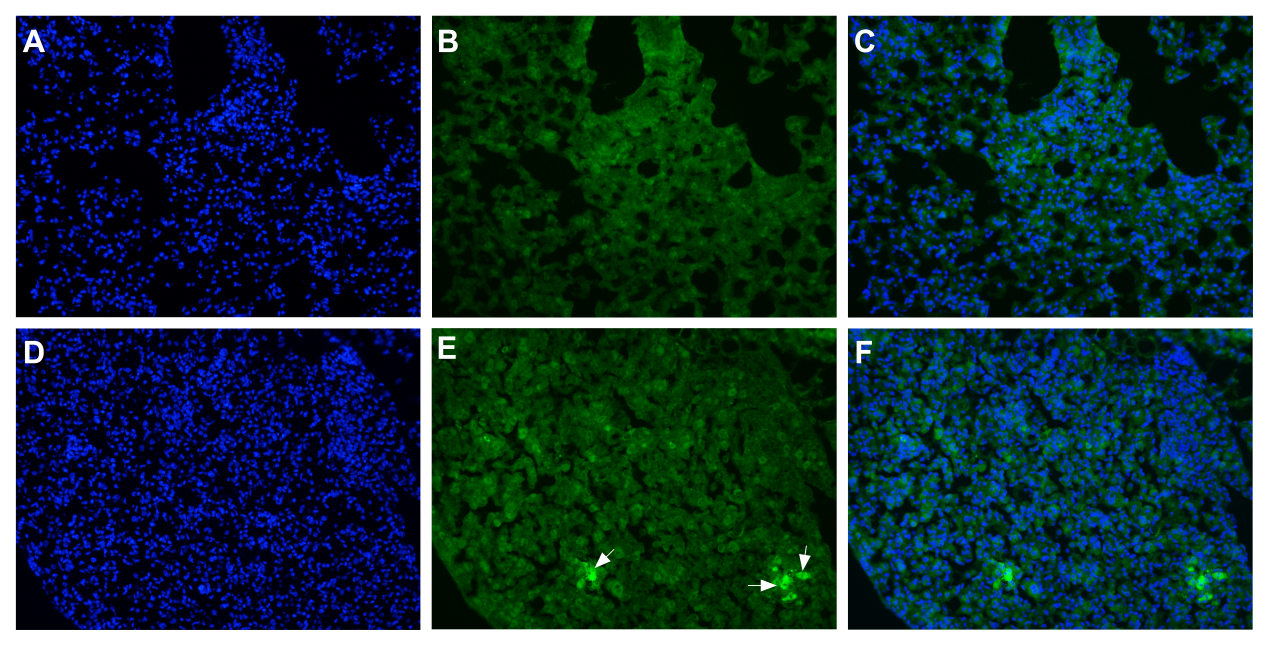


**Detection of CM-Dil-labeled GMSCs.**

**Notes: (A, C)** DAPI. **(B, D)** Fluorescence. **(C, E)** Merge. GMSCs were treated with CM-Dil and fluorescence signal was captured by a fluorescent microscope. Black arrows indicate CM-Dil-labeled GMSCs. The DAPI color was blue and CM-Dil color was green. Engraftment of GMSCs was detected in lung tissue. **(A-F, 100x** magnification).
